# Supplementary material for: Identification of Lifestyle Behaviors Associated with Recurrence and Survival in Colorectal Cancer Patients Using Random Survival Forests
Source: MDPI journal article supplement (doi:10.3390/cancers13102442), 2021-05-18
Supplement: s1 [file s1]

# Identification of Lifestyle Behaviors Associated with Recurrence and Survival in Colorectal Cancer Patients Using Random Survival Forests

Moniek van Zutphen, Fränzel J. B. van Duijnhoven, Evertine Wesselink, Ruud W. M. Schrauwen, Ewout A. Kouwenhoven, Henk K. van Halteren, Johannes H. W. de Wilt, Renate M. Winkels, Dieuwertje E. Kok and Hendriek C. Boshuizen

**Table S1.** Overview of all post-diagnosis lifestyle variables included in the Random Survival Forest models.

| Lifestyle Variables                    | Description                                                                                                                                                                                   |
|----------------------------------------|-----------------------------------------------------------------------------------------------------------------------------------------------------------------------------------------------|
| <b>Diet (g/day)</b>                    |                                                                                                                                                                                               |
| Fruits & vegetables                    | Any type of fruits and vegetables                                                                                                                                                             |
| Fruits                                 | Any type of fruits                                                                                                                                                                            |
| Vegetables                             | Any type of vegetables                                                                                                                                                                        |
| Legumes                                | Any type of legumes                                                                                                                                                                           |
| Ratio of wholegrains to refined grains |                                                                                                                                                                                               |
| Wholegrains                            | Brown and wholemeal bread, rye bread, oats, wholemeal pasta, brown rice                                                                                                                       |
| Refined grains                         | White bread, croissant, cornflakes, muesli, white pasta, white rice                                                                                                                           |
| Fast foods, snacks, and sweets         | French fries, crisps, pastry and biscuits, savoury snacks, candy, sauces, pizza, pancakes, sandwich fillings high in sugar of fat, refined grains, sweet dairy desserts, and diet soft drinks |
| Red and processed meat                 | Any type of red and processed meat                                                                                                                                                            |
| Red meat                               | Steak, organ meat, beef roll, pork tenderloin, minced meat                                                                                                                                    |
| Processed meat                         | Sausages, bacon, ribs, ham, cold cuts                                                                                                                                                         |
| Poultry                                | Any type of poultry                                                                                                                                                                           |
| Fish                                   | Any type of fish, with a maximum of 4g lean fish <sup>1</sup>                                                                                                                                 |
| Eggs                                   | Boiled and fried eggs                                                                                                                                                                         |
| Soy products                           | Soy, bean curd, soy milk, soy drink, soy yoghurt                                                                                                                                              |
| Dairy                                  | Milk, yoghurt, quark, sweet dairy desserts, sweetened dairy drinks, coffee creamer, and a maximum of 40g cheese <sup>1</sup>                                                                  |
| Cheese                                 | Any type of cheese                                                                                                                                                                            |
| Sugary drinks                          | Any type of sugary drinks including fruit juice and sweetened dairy                                                                                                                           |
| Tea                                    | Any type of tea                                                                                                                                                                               |
| Herbal tea                             | Any type of herbal tea                                                                                                                                                                        |
| Coffee                                 | Any type of coffee                                                                                                                                                                            |
| Mineral water                          | Any type of mineral water                                                                                                                                                                     |
| Alcohol-free beer                      | Any type of alcohol-free beer                                                                                                                                                                 |
| Ethanol from alcoholic drinks          | Ethanol from beer, wine, liquor                                                                                                                                                               |
| Beer                                   | Any type of alcoholic beers                                                                                                                                                                   |

|                                            |                                                                        |
|--------------------------------------------|------------------------------------------------------------------------|
| Wine                                       | Any type of wines                                                      |
| Liquor                                     | Any type of liquor                                                     |
| Ratio of liquid fats to solid fats         |                                                                        |
| Solid cooking fats                         | Butter, low-fat butter, hard margarine, solid backing/frying fat, lard |
| Liquid fats & oils                         | Soft margarine, low fat spreads, liquid cooking fats, olive oil        |
| Potatoes                                   | Boiled or baked potatoes                                               |
| Soups                                      | Any type of soups                                                      |
| Energy intake (kcal/day)                   | Total intake based on all FFQ items                                    |
| Dietary fiber                              | Total intake based on all FFQ items                                    |
| Protein                                    | Total intake based on all FFQ items                                    |
| Plant protein                              | Total intake based on all FFQ items                                    |
| Animal protein                             | Total intake based on all FFQ items                                    |
| Total fat                                  | Total intake based on all FFQ items                                    |
| Saturated fat                              | Total intake based on all FFQ items                                    |
| Monounsaturated fat                        | Total intake based on all FFQ items                                    |
| Polyunsaturated fat                        | Total intake based on all FFQ items                                    |
| Trans fat                                  | Total intake based on all FFQ items                                    |
| Carbohydrates                              | Total intake based on all FFQ items                                    |
| Mono- and disaccharides                    | Total intake based on all FFQ items                                    |
| Polysaccharides                            | Total intake based on all FFQ items                                    |
| <b>Physical activity (min/week)</b>        |                                                                        |
| Moderate-to-vigorous activities            | All activities $\geq 3$ MET                                            |
| Walking                                    | Leisure time and commuting                                             |
| Biking                                     | Leisure time and commuting                                             |
| Gardening                                  | $\geq 3$ MET                                                           |
| Sports                                     | All sports $\geq 3$ MET                                                |
| Vigorous household activities and odd jobs | $\geq 3$ MET                                                           |
| <b>Adiposity</b>                           |                                                                        |
| Body mass index (kg/m <sup>2</sup> )       | Based on self-reported height and weight                               |
| Waist circumference (cm)                   | Difference from 94cm (M) or 80cm (F)                                   |
| Waist hip ratio (cm)                       | Difference from 0.95 (M) or 0.80 (F)                                   |
| <b>Smoking</b>                             |                                                                        |
| Current smoker (yes/no)                    |                                                                        |
| Number smoked per day                      |                                                                        |

---

<sup>1</sup>Based on the Dutch Healthy diet index {Looman, 2017 #3527}

Abbreviations: MET, metabolic equivalent value; M, male; F, female.

**Table S2.** Variables predictive of recurrence or all-cause mortality, based on variable importance, by tumor location.

| <b>Variables Predictive of Recurrence</b>          | <b>Colon</b><br>Number of times selected as predictive variable in 10 repetitions of RSF model | <b>Rectum</b><br>Number of times selected as predictive variable in 10 repetitions of RSF model |
|----------------------------------------------------|------------------------------------------------------------------------------------------------|-------------------------------------------------------------------------------------------------|
| <i>Stage</i>                                       | 10                                                                                             | 10                                                                                              |
| <i>Adjuvant chemotherapy</i>                       | 10                                                                                             | 10                                                                                              |
| Sugary drinks                                      | 10                                                                                             | 0                                                                                               |
| Alcohol-free beer                                  | 10                                                                                             | 5                                                                                               |
| Liquor                                             | 9                                                                                              | 0                                                                                               |
| Trans-fats                                         | 8                                                                                              | 1                                                                                               |
| Saturated fat                                      | 8                                                                                              | 10                                                                                              |
| Fast foods                                         | 7                                                                                              | 0                                                                                               |
| Soy products                                       | 0                                                                                              | 10                                                                                              |
| Total fat                                          | 1                                                                                              | 10                                                                                              |
| Wholegrains (percentage)                           | 0                                                                                              | 8                                                                                               |
| Dairy                                              | 6                                                                                              | 0                                                                                               |
| Polyunsaturated fat                                | 4                                                                                              | 0                                                                                               |
| Alcohol                                            | 2                                                                                              | 0                                                                                               |
| Physical activity                                  | 2                                                                                              | 0                                                                                               |
| Tea                                                | 0                                                                                              | 6                                                                                               |
| <i>Age</i>                                         | 0                                                                                              | 5                                                                                               |
| Plant protein                                      | 0                                                                                              | 3                                                                                               |
| Mono- and disaccharides                            | 0                                                                                              | 3                                                                                               |
| Household activities                               | 0                                                                                              | 2                                                                                               |
| <b>Variables predictive of all-cause mortality</b> |                                                                                                |                                                                                                 |
| <i>Age</i>                                         | 10                                                                                             | 10                                                                                              |
| <i>Stage</i>                                       | 10                                                                                             | 0                                                                                               |
| <i>ASA classification</i>                          | 10                                                                                             | 0                                                                                               |
| Fruit                                              | 10                                                                                             | 0                                                                                               |
| Liquid fat & oil                                   | 10                                                                                             | 0                                                                                               |
| Soup                                               | 0                                                                                              | 10                                                                                              |
| Sugary drinks                                      | 0                                                                                              | 10                                                                                              |
| Red meat                                           | 0                                                                                              | 10                                                                                              |
| Processed meat                                     | 0                                                                                              | 10                                                                                              |
| Animal protein                                     | 0                                                                                              | 10                                                                                              |
| <i>Chemotherapy</i>                                | 1                                                                                              | 9                                                                                               |
| Fruit & vegetables                                 | 9                                                                                              | 0                                                                                               |
| Polyunsaturated fat                                | 2                                                                                              | 7                                                                                               |
| Fish                                               | 0                                                                                              | 5                                                                                               |
| Coffee                                             | 4                                                                                              | 0                                                                                               |

---

|                  |   |   |
|------------------|---|---|
| Liquor           | 4 | 0 |
| Saturated fat    | 0 | 3 |
| Potatoes         | 1 | 3 |
| Dairy            | 3 | 0 |
| Herbal tea       | 2 | 0 |
| Plant protein    | 0 | 2 |
| Beer             | 0 | 2 |
| <i>Education</i> | 0 | 2 |

---

Variables printed in *italics* are background variables, all other variables are lifestyle variables. Variables were selected as predictive based on their VIMP values. Only variables selected in  $\geq 2$  model repetitions are included in this table.
